# Supplementary material for: Preprint: Data on Peer Reviewed Papers about Recreational Disturbance of Coastal Avifauna
Source: Preprints.org preprint supplement (doi:10.20944/preprints201909.0115.v1), 2019-09-10
Supplement: Supplementary file 3 [file supplementary]

## Sheet: Sheet1
No.	Year	Title	APA In-Text Citation	Journal	Location	Country	Study zone	Mega-Regions or Continents covered by study	Ocean zone	Koppen Climate Categories	Type of research	Research method	Recrwational Disturbance	Categories of recreational activities	Affected behaviour	Type of Impact	Primary impact	Secondary impact	Recommended Management Actions	Implications for Tropical Asia
1	2018	Piping Plover Chick Survival Negatively Correlated With Beach Recreation	DeRose-Wilson et al., 2018	The Journal of Wildlife Management	Fire Island and Westhampton Island, New York	USA	Terrestrial	North America	North Atlantic Ocean	Cfa	Ecological	Observational	People walking, ORV	Walking, Powered Commercial Vehicles	Foraging, survival, habitat use, condition, and behavior	Negative	Limiting the functional availability of shorebird foraging habitat	Lower feeding rates, slower growth, and decreased survival	Managers should also be aware that the effects of weekend disturbance on survival can last throughout the week, even in moderately used areas.	Implemeting special management strategies in days with high visitor traffic (weekends, vacations)
2	2018	The price of success: integrative long‐term study reveals ecotourism impacts on a flagship species at a UNESCO site.	Monti et al., 2018	Animal Conservation	Scandola MPA (UNESCO World Heritage Site, Corsica island	France	Terrestrial	Europe	North Atlantic Ocean	Csb	Ecological	Observational	Powered Boat traffic	Powered Commercial Watercraft	Breeding, feeding to chicks	Negative	Decreased prey provisioning rate and increased time spent alarming and flying	Increased stress, and corticosterone levels in chicks	Disturbance caused by enhanced boat traffic has to be carefully managed.	Controling the number boats closer to bird colonies
3	2018	Measuring behavioral responses of sea turtles, saltwater crocodiles, and crested terns to drone disturbance to define ethical operating thresholds	Bevan et al., 2018	PLOS ONE	Bare Sand Island, NT, Australia	Australia	Terrestrial	Australia	South Pacific Ocean (Coral sea)	Csb	Ecological	Experimental	Unmanned aerial vehicles (UAV or drones)	Powered Personal Aircraft	Vigilance, escape	Negative	Increased vigilance (raised wings and multiple, lateral head movements) and flushing	Reduced reproductive success	Behavioral disturbance thresholds for diverse species should be considered when establishing operating conditions for drones	Imposing guidelines to operate drones in breeding sites (minimum distance between ground and the drone, maximum time)
4	2018	Hunting with lead ammunition is not sustainable: European perspectives	Kanstrup et al., 2018	Royal Swedish Academy of Sciences	Europe	Various	Terrestrial	Europe	North Atlantic Ocean	Csb	HD & RA	Traditional review	Hunting	Hunting Birds for Recreation	Abundance	Negative	Population decline	None reported	Improving constructive dialogue between hunting stakeholders and others engaged with enhancing biodiversity and nature conservation objectives	No Transferable Outcome
5	2017	Wintering Waterfowl Avoidance and Tolerance of Recreational Trail Use	Trulio & White, 2017	Waterbirds	South end of the San Francisco Bay, California, USA	USA	Aquatic	North America	North Pacific Ocean	Csb	Ecological	Experimental	Trail use by people	Waking, Jogging, Non-Powered Personal Vehicles	Abundance	Negative	Birds are forced to leave the site	Reduced abundance of birds	Managers should consider putting new trails approximately 200 m from wintering waterfowl foraging habitat to reduce or avoid immediate impacts to waterfowl	Designing new nature trails by considering FIDs of different bird species occupied the location
6	2017	Waterbird responses to regular passage of a birdwatching tour boat: Implications for wetland management	McFadden et al., 2017	Journal for Nature Conservation	Santoña, Victoria and, Joyel Marshes Natural Park	Spain	Aquatic	Europe	North Atlantic Ocean	Csa	Ecological	Experimental	Boats, bird watching	Bird Watching, Powered Commercial Watercraft	FID	Negative	Increased FID	Disturbance to general bird behaviour	Managers may substantially minimize boat disturbance to waterbirds through careful tour route planning and the implementation of FID-based buffer zones	Planning tour routes to minimise the disturbance from the boats
7	2017	Waterbird flight initiation distances at Barberspan Bird Sanctuary, South Africa	Coetzer & Bouwman, 2017	KOEDOE - African Protected Area Conservation and Science	Barberspan Bird Sanctuary (26° 35̕ S 25° 35̕ E), 307 km west of Johannesburg, between Sannieshof and Delareyville	South Africa	Terrestrial	Southern Africa	South Atlantic Ocean	BSk	Ecological	Experimental	Avitourists	Bird Watching	FID	Negative	Increased FID	None reported	Use of different approach distances for differing bird sizes and buffer zones based on the average water level	Considering water level of the area when establishing buffer zones
8	2017	Habitat-dependent changes in vigilance behaviour of Red-crowned Crane influenced by wildlife tourism	Li et al., 2017	Scientific reports	Suaeda salsa salt marshes	China	Terrestrial	East Asia	North Pacific Ocean	Cfa	Ecological	Observational	Bird watching, wildlife photography	Bird Watching	Vigilance	Negative	Increased vigilance	Reduced foraging	The number of wildlife tourists and the time of day tourists are permitted to view cranes should be managed carefully, particularly at important foraging sites. Wildlife tourists should also be informed about the potential consequences of their activities	Awareness programes for tourists to educate them about the consequences of their disturbance on birds and how to behave in important and sensitive areas for birds (roosting sites, breeding colonies)
9	2017	Factors affecting the spatial distribution and breeding habitat of an insular cliff-nesting raptor community	Rodríguez et al., 2017	Current Zoology	Canary Islands are a volcanic archipelago, west Africa	Spain	Terrestrial	Europe	Mediterranean Sea	Cfa	Ecological	Observational	Presence of people	Walking	Spatial distribution and breeding	Negative	Impacts on spatial distribution and abundance of birds	None reported	Preservation of areas of low human pressure. Strictly regulating the practice of recreational activities as sailing, rock climbing, rappel, or hiking. Reinforcing the monitoring programs and studies on behavior and breeding rates of these species.	Regulating beach recreational activities by introducing rules and limitations. Encouraging monitoring programmes and studies on coastal birds. Maintaining areas with less human presence.
15	2017	Behavioral responses of chinstrap and gentoo penguins to a stuffed skua and human nest intruders	Lee et al., 2017	Polar Biology	Nare˛bski Point (Fig. 1; 62_x0003_14.30S, 58_x0003_46.50W) on King George Island	Antarctica	Terrestrial	Antarctica	Antarctic Ocean/ the Austral Ocean	EF	Ecological	Experimental	Intruders	Walking	Disturbance related response	Negative	Habituation to human presence	None reported	Not specified	No Transferable Outcome
10	2016	Absence from the nest due to human disturbance induces higher nest predation risk than natural recesses in Common Eiders Somateria mollissima	Stien and Ims, 2016	Ibis	islands of Grindøya and Håkøya in northern Norway	Norway	Terrestrial	Europe	North Atlantic Ocean	Dfc	Ecological	Observational	People	Presence of people	Nesting	Negative	Departures from the nest due to human disturbance	Increased predation, reduced nest survival and breeding success	Management of trials to reduce nesting disturbance	Managing nature trails to reduce the impact of tourists on nesting success
11	2016	Reconciling recreational use and conservation values in a coastal protected area	Stigner et al., 2016	Journal of Applied Ecology	Moreton Bay Marine Park, Queensland, Australia	Australia	Both	Australia	South Pacific Ocean (Coral sea)	Cfa	Ecological	Observational	People, dogs	Beach activities, Dog Exercise	Abundance and occupancy	Negative	Negative effect on shorebird abundance and occupancy	None reported	Zoning and restricting dogs in high sensitive areas.	Dividing the area in to several zones and permiting recreational activities only in selected zones
12	2016	The role of information in changing tourists behavioral preferences at the Humboldt penguin reserve in northern Chile	Lavin et al., 2016	Ocean & Coastal Management	The “National Reserve for the Humboldt Penguin” is located in northern Chile	Chile	Both	South America	Southeastern Pacific Ocean	Csb	Human dimensions	Experimental	People	Walking	Physiology (Stress)	Negative	Increased stress in Penguins	None reported	Well-defined educational and informational campaigns. Granting ecological information as an important tool to encourage conservation behavior.	Organizing educational and informational campaigns for tourists to aware them about importance of shorebirds, threats to them and importance of conservation
13	2016	Off-road vehicles affect nesting behaviour and reproductive success of American Oystercatchers Haematopus palliatus	Borneman et al. 2016	Ibis	Cape Lookout National Seashore, on the Atlantic coast of the USA	USA	Terrestrial	North America	North Atlantic Ocean	Cfa	Ecological	Observational	Pedestrians, ORV, aircrafts	Walking, Powered Commercial Vehicles, Powered Commercial Aircraft	Nesting behaviour and reproductive success	Negative	Nest abandonment	Decreased nest survival and hatching success	Management of vehicles and pedestrians in nesting habitats (breeding colonies)	Management of vehicles and pedestrians by introducing speed limits
14	2016	Prior exposure to capture heightens the corticosterone and behavioural responses of little penguins (Eudyptula minor) to acute stress	Carroll et al., 2016	Conserv Physiol	Phillip Island (38°31′S, 145°08′E), off the coast of Victoria, Australia.	Australia	Terrestrial	Australia	South Pacific Ocean (Coral sea)	Cfa	Ecological	Experimental	Capturing & handling, visitation	Presence of people	Physiology (Stress)	Negative	Increased corticosteron concentrations	Heightened aggression and stress	Small alterations to research and tourism protocols	Designing research procedures and recreational activities to minimize the disturbance to general bird behaviour
16	2016	Human Activity and Habitat Characteristics Influence Shorebird Habitat Use and Behavior at a Vancouver Island Migratory Stopover Site	Murchison et al., 2016	Environmental Management	Vancouver Island Migratory Stopover Site	Canada	Terrestrial	North America	North Pacific Ocean	Cfb	Ecological	Observational	Walking with and without dogs	Walking, Dog Exercise	Foraging, roosting	Negative	Shorebird absence from beaches/ spending more time on moving	Reduced foraging	Establishing mandatory buffer distances between people and shorebirds, restrictions on fast-moving activities (e.g., running, biking), prohibiting dogs, and seasonal closures of wide beach sections.	Establishing buffer zones, restrictions on fast-moving activities (running, biking), prohibiting dog exercise and seasonal closures of wide beach sections.
17	2016	Variability in the area, energy and time costs of wintering waders responding to disturbance	Collop et al., 2016	Ibis	Wash (52° 56’ 16” N, 00° 17’ 16” E), a large embayment in eastern England on the North Sea coast	UK	Terrestrial	Europe	North Atlantic Ocean	Cfb	Ecological	Experimental	Walking people	Walking	FID, alert, locomotion, foraging,	Neutral	No siginificant negative impact	None reported	Greater emphasis is needed on recording time-related measures of responses to disturbance to understand the constraints on birds’ time and energy budgets, rather than simply reporting FID	Understanding the relationship between responses to disturbance and constraints on bird's time and energy budget
18	2016	African Penguin tolerance to humans depends on historical exposure at colony level	Pichegru et al., 2016	Bird Conservation International	African Penguin colonies in South Africa.	South Africa	Terrestrial	Southern Africa	South Atlantic Ocean	ET	Ecological	Both Observational & Experimental	Walking people	Walking	Breeding	Negative	Increased stress in Penguins	Impair reproduction	Maintaining some areas free of disturbance. Increase visitation of already accessible, frequently visited colonies, if necessary, rather than opening up new colonies for visitation.	Increase visitation of already accessible, frequently visited colonies if necessary, rather than opening up new colonies for visitation.
19	2016	Predictive modelling to identify near-shore, fine-scale seabird distributions during the breeding season	Warwick-Evans et al., 2016	PLOS ONE	Alderney, Channel Islands	Great Britain	Both	Europe	North Atlantic Ocean	Cfb	Ecological	Experimental	Fishing, watersports and coastal developments	Sporting Events - Terrestrial Non-Powered and Powered, Marine Non-Powered and Powered, Beach Fishing	Habitat use	Negative	Impacts on habitat use	None reported	Vantage-point observations are an ideal method in which to monitor bird distributions in near-shore coastal waters under the right conditions	Continuous monitoring of coastal birds
20	2016	Measuring the influence of unmanned aerial vehicles on Ade´lie penguins	Rümmler et al., 2016	Polar Biology	Ardley Island, South Shetland Islands, Maritime Antarctic	Antarctic	Terrestrial	Antarctica	Antarctic Ocean/ the Austral Ocean	EF	Ecological	Experimental	Unmanned aerial vehicles (UAVs)	Powered Personal Aircraft	Vigilance	Negative	Increased vigilance	None reported	Establishing UAV regulations and prevent negative effects of UAV use on bird colonies	Imposing guidelines to operate drones in breeding sites (minimum distance between ground and the drone, maximum time)
21	2015	Effects of human disturbance on cave-nesting seabirds: the case of the storm petrel	Soldatini et al., 2015	Conservation Physiology	Marettimo Island, Italy	Italy	Terrestrial	Europe	Mediterranean sea	Csa	Ecological	Experimental	Walking people	Walking	Nesting	Negative	Increased stress	Habituation	Long-term studies on anthropogenic stress are needed in order to understand the extent of consequences of human activities on animal populations	Conducting long-term studies on anthropogenic stress on birds
22	2015	Responses of birds to humans at a coastal barrier beach: Napatree Point, Rhode Island	Mayo et al., 2015	Northeastern Naturalist, 22(3): 501-512	Barrier beach at Napatree Point Rhode Island	England	Terrestrial	North America	North Atlantic Ocean	Dfb	Ecological	Both Observational & Experimental	People	Walking, Jogging, Dog Exercise, Powered Commercial Watercraft, Non-Powered Personal Watercraft	Foraging , roosting	Negative	Birds are flushed away	None reported	Buffer zone for human acces	Establishing buffer zones around important bird habitats
23	2015	Effects of aircraft and recreation on colonial waterbird nesting behavior	Hillman et al., 2015	The Journal of Wildlife Management	North Core Banks, Cape Lookout National Seashore (CALO), North Carolina	USA	Terrestrial	North America	North Atlantic Ocean	Cfa	Ecological	Observational	People, ATV, ORV	Walking, Powered Commercial Vehicles, Powered Commercial Aircraft	Nesting	Neutral	Reduced nesting success	None reported	Management policies, 50-m buffer between the colony edge and symbolic fencing	Establishing buffer zones, Using physical barriers such as fences
24	2015	Stakeholder knowledge of threatened coastal species; the case of beach-goers and the Hooded Plover Thinornis rubricollis	Maguire et al., 2015	Journal of Coastal Conservation	Victorian beaches	Australia	Terrestrial	Australia	South Pacific Ocean (Coral sea)	Cfa	Human Dimensions	Questionnaires	Beach-goers	Walking	Chick survival	Negative	Reduced chick survival	None reported	Using management tools such as signs and fences in intense management areas	Using management tools such as signs and fences in intense management areas
25	2015	Effects of human presence on the long-term trends of migrant and resident shorebirds: evidence of local population declines	Martin et al., 2015	Animal Conservation	Los Lances Beach, southern Spain	Spain	Terrestrial	Europe	North Atlantic Ocean	Csa	Ecological	Bth Observational & experimental	People	Presence of people	Abundance, foraging	Negative	Reduced abundance and foraging	Negative impact on the long-term trends of a resident shorebird species	Implementing buffer zone systems	Establishing buffer zones around important bird habitats
26	2015	Behavioural responses of wintering black-faced spoonbills (Platalea minor) to disturbance	Choi et al., 2015	AGRIS	Chang-Yong Choi, Hyun-Young Nam, Woo-Shin Lee	Korea	Both	East Asia	North Pacific Ocean (East sea	Cfa	Ecological	Experimental	People, vehicles	Waking, Powered Personal Vehicles	FID	Negative	Birds are flushed away	None reported	Implementing buffer zone systems during peak migration periods	Establishing buffer zones around important bird habitats
27	2014	Assessing anthropogenic disturbances to develop buffer zones for shorebirds using a stopover site	Koch & Paton, 2014	The Journal of Wildlife Management	Monomoy Refuge (418370N, 698590W) in Chatham, Massachusetts, USA	USA	Terrestrial	North America	North Atlantic Ocean	Dfb	Ecological	Experimental	Pedestrian traffic, fishing	Walking, Beach Fishing, Boat Fishing	FID	Neutral	No siginificant negative impact	None reported	Implementing buffer zones	Establishing buffer zones around important bird habitats
28	2014	The nature, extent, and ecological implications of marine light pollution	Davies et al., 2014	Frontiers in Ecology and the Environment (Front Ecol Environ)	Global	Global	Both	Global	Global	Global	Review article	Traditional Review	Artifitial light	Artifitial lighting in coasts	Navigation (locomotion), extension of visual foraging to night	Negative	Extension of visual foraging to night	None reported	A concerted research effort is clearly needed to document and understand the environmental impacts of light pollution in the marine environment so that effective statutory protective measures can be developed	More research work will be needed to clearly identify the impacts of artificial lights in coastal environments
29	2014	Out of sight but not out of harm’s way: Human disturbance reduces reproductive success of a cavity-nesting seabird	Watson et al., 2014	Biological Conservation	Mousa is a small (2 km2) island located in the Shetland archipelago,	UK	Terrestrial	Europe	North Atlantic Ocean	Cfb	Ecological	Observational	Visitors	Walking	Breeding success	Negative	Higher nestling mortality, decline in breeding	Reduced individual fitness and overall colony productivity	The relative costs and benefits of public access should be evaluated on a site and species-specific basis. Conservation managers should consider the potential for impacts on less obvious animals and it should not be assumed that animals remaining out of sight are out of harm’s way.	Applying conservation measures by considering relative costs and benefits of public access to protected areas
30	2014	Pro-environmental beach driving is uncommon and ineffective in reducing disturbance to beach-dwelling birds	Weston et al., 2014	Environmental Management		Australia	Terrestrial	Australia	South Pacific Ocean (Coral sea)	Csb	Ecological	Observational	ORV, 4WD	Powered Commercial Vehicles, Powered Personal Vehicles	Acute injury and/or death, foraging	Negative	Bird collisions with vehicles, reduced foraging	None reported	Beach closures of various temporal and spatial scales. If coexistence cannot be achieved, other ways of discouraging or preventing vehicle use on ocean beaches are required.	Temporary beach closure t discourage/ prevent vehicle use on ocean beaches
31	2013	Temporal and spatial variation in bird and human use of beaches in southern California	Lafferty et al., 2013	Springerplus	12 sandy beaches in Ventura California	USA	Terrestrial	North America	North Pacific Ocean	Csb	Ecological	Observational	People	Presence of people	Abundance and occupancy	Negative	Decreased abundance and species richness	None reported	Enforcing leash laws and setting up human exclosures near estuary mouths	Restricting human presence near estuary mouths
32	2013	Human recreation alters behaviour profiles of non-breeding birds on open-coast sandy shores	Schlacher et al., 2013a	Estuarine, Coastal and Shelf Science	200 km of sandy shoreline in Eastern Australia, including the large conservation area of Fraser Island	Australia	Terrestrial	Australia	South Pacific Ocean (Coral sea)	Cfa	Ecological	Observational	Vehicle	Powered Commercial Vehicles, Powered Personal Vehicles	Escape	Negative	Bird encountered by motorized vehicles, flushing away, spending one-third of their time on disturbance-related behaviours	None reported	Encouragement of social norms that promote environmentally benign beach use not involving motor vehicles. Creation of spatial refuges for beach wildlife from traffic and other non-compatible uses. Investment in developing complementary management actions such as effective set-back distances.	Encouraging tourists not to use motor vehicles at beaches and to engage in recreational activities in environmentally friendly manner. Creation of spatial refuges for shorebirds
33	2013	Setback distances as a conservation tool in wildlife-human interactions: testing their efficacy for birds affected by vehicles on open-coast sandy beaches	Schlacher et al., 2013b	PLOS ONE	ocean-exposed beaches of two barrier islands, North Stradbroke Island and Fraser Island, located off southeast Queensland	Australia	Terrestrial	Australia	South Pacific Ocean (Coral sea)	Csb	Ecological & Human dimensins	Both Observational & Experimental	ORV, cars, buses, motor bikes and small aircraft	Powered Commercial Vehicles, Powered Personal Vehicles, Powered Commercial Aircraft	Habitat use	Negative	Bird-vehicle encounters	None reported	Buffers reduce response rates, they are likely to be much less effective than vehicle-free zones (i.e. beach closures), and rely on changes to current driver behaviour.	Establishing buffer zones, Beach closures during breeding season
34	2013	Set-back distances to protect nesting and roosting seabirds off Vancouver Island from boat disturbance	Chatwin et al., 2013	Waterbirds	Vancouver Island, Canada	Canada	Terrestrial	North America	North Pacific Ocean	Cfb	Ecological	Experimental	Boats	Powered Commercial Watercraft, Non-Powered Personal Watercraft	Nesting, roosting	Negative	Increased agitation	None reported	Setbacks could be adjusted to protect locally sensitive sites or species.	Designing setbacks to protect locally sensitive sites or species
35	2013	Shorebirds and stakeholders: Effects of beach closure and human activities on shorebirds at a New Jersey coastal beach	Burger and Niles, 2013	Urban Ecosystems	Brigantine, New Jersey	USA	Terrestrial	North America	North Atlantic Ocean	Cfa	Ecological & Human dimensins	Observational	Walking, dog-walking and other recreational activities	Walking, Dog exercise, General beach activities	Habitat use	Negative	Disrupted spatial use of habitat by shorebirds	None reported	Stakeholders views, human uses, beach physiognomy should be taken in to account when implementing conservation measures. Potential closure of refuge areas during critical migration times for shorebirds.	Closure of refuge areas during critical migration times for shorebirds. Stakeholders views can be taken in to accunt when planning cnservation measures
36	2013	Heart rate responses provide an objective evaluation of human disturbance stimuli in breeding birds	Ellenberg et al., 2013	Conservation Physiology	The Otago Peninsula on the east coast of New Zealand’s South Island	New Zealand	Terrestrial	Oceania	Southwestern Pacific Ocean	Cfb	Ecological	Experimental	Tourists, wildlife photographers	Presence of people	Physiology (Heart rate)	Negative	Elevated heart rate	Increased energy demands	To reduce cumulative impact of disturbance, any human presence in the proximity of Yellow-eyed penguins needs to be kept at a minimum. objective quantification of the effects of human disturbance is needed to provide a sound basis for guidelines to manage human activity around breeding birds.	Quantified effects of human disturbance can be used as a sound basis for guidelines to manage human activity around breeding birds.
37	2013	Human disturbance and stage-specific habitat requirements influence snowy plover site occupancy during the breeding season	Webber et al., 2013	Ecology and Evolution	coastal areas on the Florida Panhandle,	USA	Terrestrial	North America	North Atlantic Ocean	Cfa	Ecological	Observational	People	Presence of people	Habitat use in breeding season	Negative	Reduced site occupancy and colonization	Changes in habitat use	Symbolic fencing and signage, may increase the amount of breeding habitat available to birds.	Symbolic fencing and signage
38	2013	Wintering waterbirds and recreationists in natural areas: a sociological approach to the awareness of bird disturbance	Le Corre et al., 2013	Environmental Management	Petite Mer de Gaˆvres lagoon, Brittany	France	Aquatic	Europe	North Atlantic Ocean	Csb	Ecological & Human dimensins	Questionnaires, interviews & observations	Recreational shellfishers, walkers, kitesurfers, windsurfers	Walking, Non-Powered Personal Watercraft	Disturbance related response	Negative	Disturbed resting of wintering waterbirds	None reported	Developing global but also specific educational information for each type of user to raise awareness of their own impact on birds	Awareness programmes for visitors to desseminate global and specific information about the impacts of recreation on birds
39	2013	Population trends of a mixed-species colony of Humboldt and Magellanic penguins in southern Chile after establishing a protected area.	Reyes-Arriagada et al., 2013	Avian Conservation and Ecology	Puñihuil Islets lie in the exposed Pacific Ocean off theIsla Grande de Chiloé (41°55′ S, 74°02′ W).	Chile	Terrestrial	South America	Southeastern Pacific Ocean	Csb	Ecological	Observational	Presence of people (tourists/ visitors)	Presence of people	Breeding	Negative	Disturbed breeding	Reduced population	Reducing the number of tourists, Limiting activities to certain areas of the colonies where birds could habituate to human presence, Implementing ecotourism management strategies, Control pollution in tourist visited sites, Involvement of representatives from government, private, academic, and nongovernmental organizations to increase the success of management plans	Reducing the number of tourists, Limiting activities to certain areas of the colonies where birds could habituate to human presence, Implementing ecotourism management strategies, Control pollution in tourist visited sites, Involvement of representatives from government, private, academic, and nongovernmental organizations to increase the success of management plans
40	2012	Effects of recreational disturbance on tidal wetlands: supporting the importance ofundisturbed roosting sites for waterbird conservation	Navedo and Herrera, 2012	Journal of Coastal Conservation	santoña victoria and joyel marshes natural park	Spain	Terrestrial	Europe	North Atlantic Ocean	Cfa	Ecological	Experimental	Walking people	Walking	Roosting	Negative	Birds are flushed away	Increased daily energy expenditure	Prior to developing recreational areas close to the shoreline, coastal wetland managers should study the habitat use of waterbirds during high tide in relation to total waterbird populations using the wetland.	Understanding the habitat use of waterbirds during high tide in relation to total waterbird populations using the wetland.
41	2012	Humans alter habitat selection of birds on ocean-exposed sandy beaches	Meager et al., 2012	Diversity and Distributions	Moreton and North Stradbroke Island, eastern Australia.	Australia	Terrestrial	Australia	South Pacific Ocean (Coral sea)	Csa	Ecological	Observational	ORV, collecting bait (polychaetes or bivalves), recreational angling, water craft (jetski or boat), domestic dog (leased or unleashed) or any other activity picnicking and short walks from parked cars or campsites).(mostly sunbathing,	Walking, Powered Commercial Watercraft, Powered Personal Watercraft, Powered Commercial Vehicles, Beach fishing, Dog exercising, Beach activities (mostly sunbathing, picnicking and short walks from parked cars or campsites)	Habitat use	Negative	Altered habitat selection	None reported	Systematic conservation planning. Adaptive management of beach access points, vehicle permits and dog ‘off-leash’ areas.	Systematic conservation planning. Adaptive management of beach access points, vehicle permits and dog ‘off-leash’ areas.
42	2012	A matter of history: effects of tourism on physiology, behaviour and breeding parameters in Magellanic Penguins (Spheniscus magellanicus) at two colonies in Argentina	Villanueva et al., 2012	Journal of Ornithology	Estancia San Lorenzo, Peninsula Valdes, Chubut, Argentina	Argentina	Terrestrial	South America	South Atlantic Ocean (Argentine sea)	Cfa	Ecological	Both Observational & Experimental	People	Walking	Breeding	Neutral	No siginificant negative impact on breeding	None reported	Continuous monitoring of tourist activity is important, as a history of visitation disturbance seems to have an effect on how birds respond to tourists.	Continuous monitoring of tourist activity and behavioural responses of birds to identify how they respond to disturbance
43	2012	Coping with continuous human disturbance in the wild: insights from penguin heart rate response to various stressors	Viblanc et al., 2012	BMC Ecology	Possession Island, Crozet Archipelago (46°25’S, 51°45’E)	Crozet Islands	Terrestrial	Antarctica	Southern Indian Ocean	ET	Ecological	Observational	Presence of peple	Presence of peple	Heart rate, habituation	Negative	Increased heart rate and stress	Habituation	Potential effects (such as habituation) of human presence (or manipulations) should be considered in ecological studies.	Potential effects of human presence should be comprehensively studied to design conservation measures
44	2012	Previous experiences with humans affect responses of Snares Penguins to experimental disturbance	Ellenberg et al., 2012	Journal of Ornithology	The Snares Islands are situated at about 100 km south-west of Stewart Island	New Zealand	Terrestrial	Oceania	Southwestern Pacific Ocean	Cfb	Ecological	Experimental	Tourists	Walking	Physiology (Heart rate)	Negative	Significantly greater HR increase that more time is needed to recover	Increased agitation (a slightly raised position or showed wing-shivering)	Human activity in and around penguin colonies should balanced against the possibility of long-term impacts.	Human activity in and around shorebird colonies should balanced against the possibility of long-term impacts
45	2012	Factors influencing Snowy Plover nest survival on ocean-fronting beaches in coastal northern California	Hardy & Colwell, 2012	Waterbirds	four ocean-fronting beaches (Clam Beach, Mad River Beach, South Spit and Eel River Wildlife Area; Fig. 1) in northern Humboldt County, California	USA	Terrestrial	North America	North Pacific Ocean	Csb	Ecological	Observational	People, vehicles, dogs	Walking, Dog Exercise, Powered Commercial Vehicles	Nest survival	Negative	Flushing away the incubating birds rm the nests	Decreased nest survival due to nest predation	Habitat restoration	Habitat restoration
46	2012	Do temporary beach closures assist in the conservation of breeding shorebirds on recreational beaches?	Weston et al., 2012	Pacific Conservation Biology	Fifteen beaches were studied along the southern coast of Victoria, Australia, between Apollo Bay (38°45'S, 143°40'E) and Wilson’s Promontory (39°04'S, 146°20'E).	Australia	Terrestrial	Australia	South Pacific Ocean (Coral sea)	Cfa	Ecological	Observational	People	Beach activities	Nesting success	Negative	Crushing of eggs by beach visitors	Reduced nesting success	Temporary beach closure configuration is meritorious, and that their use on high and low-use recreational beaches will benefit breeding shorebirds by reducing the rate of egg-crushing	Temporary beach closure
47	2011	A Review of Human Disturbance Impacts on Waterbirds	Borgmann, 2011	Audubon California	Worlwide	Global	Both	Global	Global	Global	Review article	Traditional Review	Walking, motorized boats, non- motorized boats, ATV, dog walking	Walking, Powered Commercial Watercrafts	Foraging, resting, vigilance, disturbance related behavior, abundance	Negative	Flushing away the birds, population level consequences	None reported	Establishing set-back distances of 250 m from waterfowl, diving ducks, wading birds, and shorebirds may lessen the impacts to the most sensitive species.	Establishing set-back distances
48	2011	A review of the impacts of nature based recreation on birds	Steven et al., 2011	Journal of Environmental Management	Worlwide	Global	Terrestrial	Global	Global	Global	Review article	Traditional Review	Wildlife viewing, hiking, running, cycling, canoeing, horse riding and dog walking	Wildlife viewing, hiking, running, Non-Powered Personal vehicles, Non-Powered Personal Watercraft, Dog exercise	Physiological changes, breeding, nesting, disturbance related responses, abundance	Negative	Alteration of the physiology and immediate behaviour of birds	Negative impacts on a diversity of birds	Managers need to take into account the source, range and intensity of potential impacts and methods to manage these impacts when zoning, providing facilities, and managing the use of facilities.	source, range and intensity of potential impacts and methods to manage these impacts when zoning, providing facilities, and managing the use of facilities should be taken in to accunt when planning cnservation o birds
49	2011	Disturbance to a foraging seabird by sea-based tourism: Implications for reserve management in marine protected areas	Velando and Munilla, 2011	Biological Conservation	Cíes islands, north-western Iberia	Spain	Aquatic	Europe	North Atlantic Ocean	Csa	Ecological	Both Observational & Experimental	Powered boats	Powered Commercial Watercrafts	Foraging , roosting	Negative	Excluded birdss from the best feeding areas	Reduced foraging due to higher densities of foragers in areas of little boat traffic	Limiting the number of boats (establishment of set-aside areas free of boat traffic)	Limiting the number of boats (establishment of set-aside areas free of boat traffic)
50	2011	Effects of human disturbance on a burrow nesting seabird	Albores-Barajas and Soldatini, 2011	Revista Mexicana de Biodiversidad	The San Benito Islands on the central west coast of Baja California, in the Mexican Pacific	Mexico	Terrestrial	North America	North Pacific Ocean	BSk	Ecological	Observational	People	Walking	Nesting	Negative	Nest abandonment and lower breeding success	Long term negative consequences for the birds	Control of the number of visitors is imposed on the island, either by keeping some areas with larger numbers of burrows off limits, or by closing the island during the breeding season	Controling the number of visitors to minimize the impact on birds
51	2011	Towards ecologically meaningful and socially acceptable buffers: Response distances of shorebirds in Victoria, Australia, to human disturbance	Glover et al., 2011	Landscape and Urban Planning	Not specified	Australia	Terrestrial	Australia	Indian Ocean	Cfb	Ecological & Human dimensins	Experimental	People, dogs	Walking, Dog Exercise	FID	Negative	Altered FID	None reported	Buffers (considering the FIDs of birds) as an appropriate way of managing disturbance to shorebirds (except for walkers, the commonest recreational activity).	Establishing buffer zones
52	2011	Nest return times in response to static versus mobile human disturbance	Weston et al., 2011	Journal of Wildlife Management	South-central ocean coast of Victoria	Australia	Terrestrial	Australia	Indian Ocean	Cfb	Ecological	Both Observational & Experimental	People (joggers,walkers, sunbathers,anglers)	Walking, jogging, Beach activities, Beach fishing	Breeding	Negative	Birds are flushed away	Disruption of incubation	Temporary beach closures	Temporary beach closures
53	2011	Tourism and wildlife habituation: Reduced population fitness or cessation of impact?	Higham & Shelton, 2011	Tourism Management	Various	Global	Both	Global	Global	Global	Review article	Traditional Review	People	Walking	Physiology (Heart rate)	Negative	Habituation to human presence	None reported	Wildlife managers and visitor managers could co-operate to apply behavioural technologies to structure almost completely the nature of humanewildlife interactions.	Wildlife managers and visitor managers could co-operate to apply behavioural technologies to structure almost completely the nature of humanewildlife interactions.
54	2011	Monitoring disturbance of shorebirds and seabirds at Buckley's hole sand spit in northern Moreton Bay	Milton et al., 2011	Sunbird	Buckley’s Hole sandspit	Australia	Both	Australia	South Pacific Ocean (Coral sea)	Cfa	Ecological	Observational	People (walkers, joggers, runners), dogs, fast- moving boats, jet ski	Walking, Powered Commercial Watercrafts, Powered Personal Watercrafts	Roosting	Negative	Disturbance related flights	Disturbed roosting	Reducing thespeed of approach by people, pets and vessels. Educating the public to move slowly and to leash dogs when approaching a high tide roost	Reducing thespeed of approach by people, pets and vessels. Educating the public to move slowly and to leash dogs when approaching a high tide roost
55	2010	Shorebirds in the State of Sergipe, northeast Brazil: potential tourism impacts	Hvenegaard and Barbieri, 2010	Revista Brasileira de Ornitologia	Atalaia Nova beach	Brazil	Terrestrial	South America	South Atlantic Ocean	Aw	Ecological	Observational	People	Walking, running, Beach fishing, Beach activities	Abudance & resting	Negative	Reduced abundance of birds	Negative impacts on shorebird use of the beach	Before tourism developments are initiated, more research should examine their potential effects on shorebird use of the area	researches on potential effects of recreation on shorebird use of the area
56	2010	An experimental assessment of vehicle disturbance effects on migratory shorebirds	Tarr et al., 2010	The Journal of Wildlife Management	on the South Core Banks, which was one of several barrier islands that made up Cape Lookout National Seashore	USA	Terrestrial	North America	North Atlantic Ocean	Cfa	Ecological	Observational	ORV used for camping & fishing	Powered Commercial Vehicles	Abudance & resting	Negative	Reduced abundance of birds and use of site for foraging and roosting	None reported	Efforts to accurately model shorebird habitat use, distribution, or behavior will benefit from inclusion of a controlled disturbance variable.	Efforts to accurately model shorebird habitat use, distribution, or behavior will benefit from inclusion of a controlled disturbance variable.
57	2010	Changing seabird management in Hawai'i: from exploitation through management to restoration	Duffy, 2010	Waterbirds	Not specified	USA	Terrestrial	North America	North Pacific Ocean	Csb	Review article	Traditional Review	Recreatinal vessel landing, Coastal Lighting	Powered Commercial Watercrafts, Artifitial lighting in coasts	Locomotion	Negative	Collisions with buildings, power lines due attraction to lights	None reported	Restoration will require a scientific approach and documentation of successes and failures, improving the chances of success for future interventions	Habitat restoration
58	2010	Recreational impacts on the fauna of Australian coastal marine ecosystems	Hardiman and Burgin, 2010	Journal of Environmental Management	Not specified	Australia	Terrestrial	Australia	South Pacific Ocean (Coral sea)	Cfa	Review article	Traditional Review	Ecotourism Infrastructure, 4WD, power boats	Ecotourism Infrastructure	Nesting, foraging, breeding	Negative	Habitat degredation, polluted sources of food	Reduced species diversity and altered the community composition of breeding sea-birds	control the spread of invasive species from vessels	Control the spread of invasive species from vessels
59	2010	Relative importance of human activities and climate driving common murre population trends in the Northwest Atlantic	Regular et al., 2010	Polar Biology	Cape St. Mary’s Seabird Ecological Reserve (CSM; 46 500N, 54 120W) on the southwestern tip of Newfoundland’s Avalon Peninsula	Canada	Terrestrial	North America	North Pacific Ocean	Dfb	Ecological	Observational	Hunting	Hunting Birds for Recreation	Population	Negative	Population decline	None reported	Management efforts should focus on assessing and mitigating the effects of human-induced influences and consider the potential additive effects of climate change	Identifying the influence of climate change on the impact of recreational disturbances
60	2010	Movements and fledging success of Snowy Plover (Charadrius alexandrinus) chicks	Wilson and Colwell, 2010	Waterbirds	Research was carried out from 2001-2008 at Clam Beach, a 10-km ocean-fronting beach in Humboldt County, California	USA	Terrestrial	North America	North Pacific Ocean	Csb	Ecological	Observational	Vehicles, clammers, equestrians and dogs	Hiking, Powered Commercial Vehicles, Sporting Events - Non-Powered	Fledging success	Negative	Reduced fledging success	None reported	Establishment of a fenced area to protect breeding birds	Using physical barriers such as fences
61	2010	Effect of approaching boats on nesting black skimmers: using response distances to establish protective buffer zones	Burger et al., 2010	Journal of Wildlife Management	Barnegat Bay, New Jersey	USA	Terrestrial	North America	North Atlantic Ocean	Cfa	Ecological	Both Observational & Experimental	Small motor boats	Powered Commercial Watercrafts	Nesting	Negative	Flushing away from the nests	None reported	Establishment of set-back distance or buffer zones	Establishment of set-back distance or buffer zones
62	2009	The impact of recreational boat traffic on Marbled Murrelets (Brachyramphus marmoratus)	Bellefleur et al., 2009	Journal of Environmental Management	Pacific Rim National Park Reserve, British Columbia, Canada	Canada	Aquatic	North America	North Atlantic Ocean	Csb	Ecological	Experimental	Powered boats	Powered Commercial Watercrafts	Escape	Negative	Birds are flushed away	Flying completely out of feeding areas	Application of speed limits, set back distances, and exclusion of boat traffic	Application of speed limits, set back distances, and exclusion of boat traffic
63	2009	Common Eider Somateria mollissima feeding activity and the influence of human disturbances	Merkel et al., 2009		Southwest Greenland	Greenland	Aquatic	North America	North Atlantic Ocean	ET	Ecological	Both Observational & Experimental	Powered boats	Powered Commercial Watercrafts	Foraging , roosting	Negative	Reduced foraging and increased locomotion at day time	Nocturnal feeding to componsate lost diurnal feeding	Important factors of eider feeding activity should be considered when dealing with eider management	Designing visitor management guidelines to minimize the impact on foraging behaviour of birds
64	2009	Are burrow nesting seabird chicks affected by human disturbance?	Albores-Barajas et al., 2009	Waterbirds	West San Benito Island off the Pacific coast of Mexico	Mexico	Terrestrial	North America	North Pacific Ocean	Cwb	Ecological	Experimental	People	Walking	Chick growth	Negative	Reduced fledging mass of chicks	Reduced chick growth	Controling the number of people allowed on the island, or exclusion of visitors from the immediate area around the auklet burrows	Controlling visitor traffic and exclusion visitors from burrowing areas
65	2009	Effects of disturbance on geese in Svalbard: implications for regulating increasing tourism	Madsen et al., 2009	Polar Research	Arctic archipelago of Svalbard, Norway	Norway	Both	North America	Arctic ocean	Dfb	Ecological	Experimental	Prescence of People, Hiking	Walking, hiking, Powered Commercial Watercrafts	Escape	Negative	Flying far away from the disturbance due to disturbance	High rate of nest loss to avian predators	Regulations of human access to goose concentrated areas, and address the need to better protect these significant areas	Regulating human access to areas which are important for birds
66	2009	Trends in abundance of coastal birds and human activity on a Texas barrier island over three decades	Foster et al., 2009	Estuaries and Coasts	Mustang Island, Texas	USA	Terrestrial	North America	Gulf of Mexico	Cfa	Ecological	Observational	Presence of people	Presence of people	Abundance (Roosting & foraging)	Negative	Population decline	None reported	Scientists and coastal managers must be prudent in monitoring coastal wildlife to ensure responsible future development.	Continuous monitoring of coastal wildlife to understand the population trends, impacts and conservation needs
67	2009	Testing the efficacy of a boundary fence at an important tropical seabird breeding colony and key tourist destination	Denvey and Congdon,2009	Wildlife Research	Michaelmas Cay is a small vegetated sand cay located on Michaelmas Reef	Australia	Terrestrial	Australia	South Pacific Ocean (Coral sea)	Cfa	Ecological	Observational	People	Presence of people	Breeding	Neutral	No significant negative impact	None reported	Use of a protective barrier such as a fence	Using physical barriers such as fences
68	2009	Threats to sandy beach ecosystems: A review	Defeo et al., 2009	Estuarine, Coastal and Shelf Science	Global	Global	Both	Global	Global	Global	Review article	Traditional Review	People, Vehicles, watercrafts	Walking, Powered Commercial Watercrafts, Powered Commercial Vehicles	Foraging, breeding, chick survival, nesting	Negative	Disturbing, injuring or killing sea birds, modifying key behavioural traits that are crucial to their survival and reproduction	None reported	Setback and zoning strategies need to be enforced through legislation, and all relevant stakeholders should be included in the design, implementation and institutionalisation of these initiatives.	Establishing buffer zones around bird colonies. Relevant stakeholders should be included in the process.
69	2009	Habituation potential of yellow-eyed penguins depends on sex, character and previous experience with humans	Ellenberg et al., 2009	Animal Behaviour	Southern New Zealand	New Zealand	Terrestrial	Oceania	Southwestern Pacific Ocean	Cfb	Ecological	Experimental	Tourists	Walking	Physiology (Heart rate)	Negative	Increased heart rate and stress	Fitness consequences and may lead to contemporary evolutionary change in the composition of breeding populations.	Managing tours. Tourists should be encouraged to book guided tours at appropriately managed breeding colonies. Nest site visits are restricted only for research and monitoring programmes.	Encouraging tourists to book guided tours to regulate the visitor traffic. Restricting access to nesting sites.
70	2009	Bird disturbance on conservation sites in Brittany (France): the standpoint of geographers	Le Corre et al., 2009	Journal of Coastal Conservation	Brittany (France)	France	Terrestrial	Europe	North Atlantic Ocean	Cfb	Review article	Traditional Review	Presence of people	Presence of people	Physiological changes, breeding, foraging, resting, disturbance related behavior	Negative	Physiological changes, increase in predation on nests, reduced parental attention to their clutch	None reported	Improving the understanding and the assessment of long term disturbance consequences	Assessments to understand long term disturbance consequences
71	2009	Experimental disturbance by walkers affects behaviour and territory density of nesting Black‐tailed Godwit Limosa limosa	Holm and Laursen, 2009	Ibis	Tipperne Reserve (55°53′N, 08°12′E) in Ringkøbing Fjord, Denmark, a large brackish lagoon adjacent to the North Sea	Denmark	Terrestrial	Europe	North Atlantic Ocean	Cfb	Ecological	Observational	Presence of people	Presence of people	Breeding/ nesting	Negative	Flushing away from the nests	Leaving nests susceptible to predation	Effective conservation of important breeding areas and maintenance	Designing effective conservation plans for breeding areas
72	2008	Compromise between seabird enjoyment and disturbance: the role of observed and observers	MartINnez-AbraIN et al., 2008	Environmental Conservation	Along the Spanish and French Mediterranean coasts, along the Iberian Atlantic and on the Mediterranean coast of northern Africa	Spain	Terrestrial	Europe	Mediterranean sea	Csa	Human Dimensions (HD)	Experimental	Walking people	Walking	FID	Habituation	Altered FID	Reduced breeding success	Implementing set-back distances, redistributing tourist visits on the basis of number of visitors	Implementing set-back distances and distributing small groups of tourists in different sites
73	2008	Influence of disturbance and predation on breeding success of the African Black Oystercatcher, Haematopus moquini, on Robben Island, South Africa	Tjørve and Underhill, 2008	Waterbirds	Robben Island	South Africa	Terrestrial	Southern Africa	South Atlantic Ocean	Csa	Ecological	Observational	Presence of people	Presence of people	Breeding success	Negative	Egg and chick losses	Reduced breeding success	Not specified	No Transferable Outcome
74	2008	Recreational activities affecting the habitat use by birds in Pampa's wetlands, Argentina: Implications for waterbird conservation	Cardoni et al., 2008	Biological conservation	Los Padres Lagoon Reserve (Argentina)	Argentina	Terrestrial	South America	South Atlantic Ocean (Argentine sea)	BSk	Ecological	Experimental	People (picnic, informal soccergames, soprt fishing - angling)	Walking, Terrestrial Non-Powered Sporting Events, Beach fishing	Habitat use	Negative	Changes in habitat use, l increased time devoted to vigilance and escape behaviour	Decrease in breeding success	Establishment of buffer areas	Establishment of buffer areas
75	2008	Spatial heterogeneity created by burrowing crabs affects human impact on migratory shorebirds	Botto et al., 2008	Estuaries and Coasts	the intertidal mudflats of the Mar Chiquita coastal lagoon	Argentina	Terrestrial	South America	South Atlantic Ocean	BSk	Ecological	Observational	Presence of people	Beach activities	FID and foraging	Negative	Reduced foraging rates	None reported	Not specified	No Transferable Outcome
76	2008	An approach to assess the potential impacts of human disturbance on wintering tropical shorebirds	Yasué et al., 2008	Oryx	five sites in and around Khao Sam Roi Yod National Park, Thailand	Thailand	Both	Southeast Asia	Gulf of Thailand	Aw	Ecological	Both Observational & Experimental	People, dogs	Walking, Dog exercise	Foraging , roosting	Negative	Reduced foraging rates	None reported	Implementing a zoning scheme based on an assessment of the value of each habitat, rather than just the number of birds	Establishing buffer zones based on the value of the habitats, behaviours of the birds and visitor traffic
77	2008	Effects of vessel activity on the near-shore ecology of Kittlitz's Murrelets (Brachyramphus brevirostris) in Glacier Bay, Alaska	Agness et al., 2008	The Auk	Glacier Bay, Alaskaka	Alaska	Aquatic	North America	North Pacific Ocean	Dsc	Ecological	Both Observational & Experimental	Powered boats	Powered Commercial Watercrafts	Foraging , loafing, locomotion	Negative	Temporaly suppressed densities of near-shore birds, increased flying behaviour	None reported	Enforcing speed limits for vessels	Enforcing speed limits for watercrafts
78	2008	Effects of human activity on behavior of Breeding American Oystercatchers, Cumberland Island National Seashore, Georgia, USA	Sabine et al., 2008	Waterbirds	Cumberland Island National Seashore (CINS)	USA	Terrestrial	North America	North Atlantic Ocean	Cfa	Ecological	Observational	People	Walking	Breeding success	Negative	Nesting failures	None reported	During brood rearing, protection from pedestrian activity should be increased, when possible and vehicular activity should be minimized	Imposing restrictions on vehicular activity during brood rearing
79	2008	Foraging shorebird response to trail use around San Francisco Bay	Trulio and Sokale, 2008	Journal of Wildlife Management	San Francisco Bay, California	USA	Terrestrial	North America	North Pacific Ocean	Csb	Ecological	Both Observational & Experimental	People	Walking	Foraging	Negative	Decreased number of shorebirds	None reported	Offering trail-free foraging opportunities	Limiting human access to important foraging grounds
80	2008	Shorebird use of sandy beaches in central California	Neuman et al., 2008	Waterbirds	Monterey Bay is a large coastal embayment in central California	USA	Aquatic	North America	North Pacific Ocean	Csa	Ecological	Observational	People	Presence of people	Habitat use	Neutral	No significant negative impact	None reported	Management and conservation of sandy beach habitats should consider both physical and spatial habitat characteristics that favor high abundances of foraging or roosting shorebirds.	Visitor management and bird conservation measures should be designed based on habitat characteristics and bird abundance
81	2008	Preliminary quantitative data on behavioural responses of Australian Pelican (Pelecanus conspicillatus) to human approach on Penguin Island, Western Australia	Barter et al., 2008	Journal of Ecotourism	Penguin Island, Western Australia	Australia	Terrestrial	Australia	South Pacific Ocean (Coral sea)	Csa	Ecological	Experimental	Tourists	Walking	Vigilance	Negative	Breeding failures, Increased alert behaviour	Reduced reproductive success	Setback distances, that are designed to separate humans from Australian pelicans, should be precautionary, being based upon the longest pre-flight distance	Separate humans and birds by setback distances
82	2007	Unauthorised human use of an urban coastal wetland sanctuary: current and future patterns	Antos et al., 2007	Landscape and urban planning	a coastal urban wetland located in Melbourne	Australia	Aquatic	Australia	Indian Ocean	Cfb	Ecological	Both Observational & Experimental	People, dog walkers, motorised trail bike, bicycles,	Walking, Dog exercise, Powered Personal Vehicles, Non-Powered Personal vehicles	Foraging , roosting	Negative	Birds have to avoid favoured feeding grounds and have to use energy on breeding grunds which is needed for return flights	Increased levels of competition and mortality due to lack of suitable feeding grounds	Education and additional physical barriers	Using physical barriers as a management tool
83	2007	Habituation and habitat changes can moderate the impacts of human disturbance on shorebird breeding performance	Baudians and Lloyd, 2007	Animal Conservation	sandy coastline of the Cape Peninsula	South Africa	Terrestrial	Southern Africa	South Atlantic Ocean	Csa	Ecological	Observational	People, dogs	Walking, Dog exercise	Breeding	Neutral	Reduced nest attentiveness, habituation	Increased chick mortality due to predation by dogs	Restricted dog access	Restricted dog access
84	2007	Elevated hormonal stress response and reduced reproductive output in Yellow-eyed penguins exposed to unregulated tourism	Ellenberg et al., 2007	General and Comparative Endocrinology	Not specified	New Zealand	Terrestrial	Oceania	Southwestern Pacific Ocean	Cfb	Ecological	Observational	People	Presence of people	Breeding	Negative	High parental baseline corticosterone concentrations and increased stress	Reduced adult fitness and survival, Lower breeding success and fledging weights	Tourists stay out of breeding areas and disturbance at penguin landing beaches is reduced	Restricted human visitation in breading areas
85	2007	Responses of Emperor Penguins (Aptenodytes forsteri) to encounters with ecotourists while commuting to and from their breeding colony	Burger and Gochfeld, 2007	Polar Biol (2007) 30:1303–1313	Snow Hill breeding colony	Antarctica	Terrestrial	Antarctica	Antarctic Ocean/ the Austral Ocean	EF	Ecological	Observational	People	Walking	Disturbance related response	Neutral	Increased energetic cost of commuting and walking, disturbed incubation	None reported	People walk in small, tight-knit groups, by having people stop moving whenever traveling penguins are within about 25 m to allow the penguins to choose the direction	Encouraging tourists to walk in small groups while visiting bird colonies
86	2007	Breeding success and population trends in Adélie penguins in areas with low and high levels of human disturbance	Carlini et al., 2007	Polar Biology	Esperanza/Hope Bay, Antarctic Peninsula	Antarctic	Terrestrial	Antarctica	Antarctic Ocean/ the Austral Ocean	Cfa	Ecological	Observational	People	Presence of people	Breeding	Neutral	No significant negative impact	None reported	Not specified	No Transferable Outcome
87	2007	Breeding of marine birds on Farwa Island, western Libya	Etayeb and Essghaier, 2007	Ostrich-Journal of African Ornithology	Farwa Island	Western Libya	Both	North Africa	North Atlantic Ocean	BSh	Ecological	Observational	People	Beach activities	Breeding	Negative	Breeding failures	None reported	Measures should be implemented in order to reduce the negative impacts that might jeopardise the avian diversity	Protective measures to mitigate impact of disturbance on bird population
88	2007	Responses of Incubating Hooded Plovers (Thinornis rubricollis) to Disturbance	Weston and Elgar, 2007	Journal of Coastal Research	Ocean beaches from Johanna Beach, west of Cape Otway to Oberon Bay, Wilson’s Promontory, Victoria	Australia	Terrestrial	Australia	Indian Ocean	Cfb	Ecological	Observational	People, vehicles, dogs	Walking, Dog exercise, Powered Personal Vehicles, Non-Powered Personal vehicles	Nesting	Negative	Absences from the nest (leaving the nest for a period of time)	Reduced incubating success	Not specified	No Transferable Outcome
89	2007	Shorebird roost‐site selection at two temporal scales: is human disturbance a factor?	Peters and Otis, 2007	Journal of Applied Ecology	the Cape Romain National Wildlife Refuge (CRNWR), approximately 50 km north of Charleston, South Carolina, USA	USA	Aquatic	North America	North Atlantic Ocean	Cfa	Ecological	Observational	Boats, Shrimp baiting	Powered Commercial Watercrafts, Beach fishing	Roosting	Negative	Avoiding roosting sites due to boat traffic	None reported	Providing a wide range of potential roosts (both natural and artificial) that could be used under different wind conditions and that are within reasonable travelling distance of preferred feeding areas.	Providing natural and artificial roosting site for birds in areas with high visitor traffic
90	2007	Comparing king, gentoo, and royal penguin responses to pedestrian visitation	Holmes, 2007	The Journal of Wildlife Management	Sub Antatctic Macquire Island	Australia	Terrestrial	Australia	South Pacific Ocean (Coral sea)	ET	Ecological	Observational	Pedestrians	Walking	Vigilance	Negative	Increased vigilance and agonism	None reported	Practical information should be applied to on-ground visitor guidelines, zoning near colonies	Zoning and designing visitor guidelines based on the information gathered from the particular site
91	2007	Habitat choice, disturbance, and management of foraging shorebirds and gulls at a migratory stopover	Burger et al., 2007	Journal of Coastal Research	migratory stopover in Delaware Bay, New Jersey.	USA	Terrestrial	North America	North Atlantic Ocean	Cfa	Ecological	Observational	People, dogs, vehicles	Walking, Dog exercise, Powered Personal Vehicles	Escape	Negative	Causing the foraging flocks to fly away from the beaches	None reported	Beach mud, creek and upper beach habitats should be equally protected from the effects of disturbance because they serve as a buffer to the tide line foraging, and because they are used for foraging by some shorebirds.	Protecting beach mud, creek and upper beach habitats as important foraging sites
92	2007	Ecotourism disturbance to wildfowl in protected areas: historical, empirical and experimental approaches in the Camargue, Southern France	Guillemain et al., 2007	Biodiversity and Conservation	Camargue, Southern France	France	Terrestrial	Europe	North Atlantic Ocean	Csa	Ecological	Observational	People	Walking	Escape	Negative	Short term disrupted normal resting activities	None reported	If some precautions are taken in terms of limiting the number of visits, guiding of people and provision of adequate facilities, then the opening to visitors can be a sustainable activity within nature reserves.	Ensuring a sustainable process in nature reserves by limiting the number of visits, guiding of people and provision of adequate facilities
93	2007	Managing visitor access to seabird colonies: a spatial simulation and empirical observations	Beale, 2007	Ibis	Orkney Islands, northern Scotland	Scotland	Terrestrial	Europe	North Atlantic Ocean	Cfc	Ecological	Observational	Visitors	Presence of people	Nest survival	Negative	Increased heart rate	Reduced nesting success	At sites with high disturbance pressures, management should aim to aggregate visitors in as small an area as possible, whereas at sites with lower disturbance pressure, an even distribution of visitors is favoured.	Aggregate visitors to a small area at sites with high disturbance pressure and distributing visitors in sites with lower disturbance pressure
94	2007	Predicting the population consequences of human disturbance for Ringed Plovers Charadrius hiaticula: a game theory approach	Liley and Sutherland, 2007	Ibis	Snettisham, Norfolk,	England	Terrestrial	Europe	North Atlantic Ocean	Cfb	Ecological	Experimental	Walking people	Walking	Abundance (population)	Negative	Birds avoiding areas of high disturbance, accidental trampling of nests, egg losses, reduced hatching success	Population decline	Restricting human access to nesting colonies	Restricting human access to nesting colonies
95	2007	Management of water bird shooting by voluntary agreements in Denmark	Schou and Bregnballe, 2007	Sustainable Development	Not specified	Denmark	Terrestrial	Europe	North Atlantic Ocean	Cfb	Ecological	Experimental and questionnaire survey	Game shooting	Recreational hunting	Habitat use	Negative	Disturbed normal bird behaviour	None reported	Locations free of shooting and other activities disturbing the water birds and self-regulated shooting where disturbance is kept at a low intensity.	Restricting recreational activities to certain areas and leave sensitive areas as refuges
96	2006	The potential impact of tourism development on habitat availability and productivity of Malaysian plovers Charadrius peronii	Yasué and Dearden, 2006	Journal of Applied Ecology	4 study areas in Prachuap Khiri Khan and Petchburi provinces in the Gulf of Thailand	Thailand	Terrestrial	Southeast Asia	Gulf of Thailand	Aw	Ecological	Observational	People, dogs, motor vehicles	Walking, Dog exercise, Powered Commercial Vehicles	Breeding	Negative	Reduced hatching success and fledging of chicks	Nest failures	Well-managed protected areas that do not allow habitat conversions and limit the number of people on beaches, sign-posted fencing around beach areas where plovers breed	Limiting the number of people in beaches. Using sign-posted fencing around beach areas
97	2006	Habituation of adult Magellanic penguins to human visitation as expressed through behavior and corticosterone secretion	Walker et al., 2006	Conservation Biology	Punta Tombo	Argentina	Terrestrial	South America	South Atlantic Ocean (Argentine sea)	BSh	Ecological	Observational	People	Walking	Physiological changes	Neutral	Habituation to human presence (No negative impact)	None reported	Monitoring the effects of anthropogenic disturbances on wildlife at multiple levels.	Monitoring the effects of anthropogenic disturbances on wildlife at multiple levels.
98	2006	Restoration of breeding by snowy plovers following protection from disturbance	Laferty et al., 2006	Biodiversity and Conservation	public beach (Sands Beach, Coal Oil Point Reserve) in Santa Barbara, California	USA	Terrestrial	North America	North Pacific Ocean	Csb	Ecological	Observational	People and dogs	Walking, Dog exercise	Abundance	Negative	Nest trampling, Reduced breeding	None reported	Protecting quality habitats	Maintaining the quality of habitats important for birds
99	2006	Effects of human recreation on the incubation behavior of American Oystercatchers	McGowan and Simons, 2006	The Wilson Journal of Ornithology	coastal North Carolina	USA	Terrestrial	North America	North Atlantic Ocean	Cfa	Ecological	Observational	People, vehicles	Walking, Powered Commercial Vehicles	Incubation	Negative	Leaving the nests, increased aggression of birds, reduced incubation	Reduced nesting success	Studies on human activity and oystercatcher nesting success that compare the behavior of birds on beaches closed to vehicle and pedestrian traffic should be carried out	Future studies on behaviours of birds with and without recreational activities to identiy the magnitude of the impacts
100	2006	Physiological and reproductive consequences of human disturbance in Humboldt penguins: The need for species-specific visitor management	Ellenberg et al., 2006	Biological Conservation	Not specified	Chile	Terrestrial	South America	Southeastern Pacific Ocean	Csb	Ecological	Observational	People	Walking	Breeding	Negative	Elevated heart rate response, increased energy expenditure	Reduced breeding success	For sustainable ecotourism visitors are required to stay out of sight of Humboldt penguin breeding and moulting areas. Management guidelines need to acknowledge that even closely related species may react very differently towards human presence.	Designing visitor management guidelines to avoid people from breeding sites
101	2006	Wading bird response to recreational boat traffic: does flushing translate into avoidance?	Peters and Otis, 2006	Wildlife Society Bulletin	Kape Romain National Wildlife Refuge, South Carolina	USA	Aquatic	North America	North Atlantic Ocean	Cfa	Ecological	Experimental	Boats	Powered Commercial Watercrafts	Escape	Negative	Birds are flushed away, abandoning favourable foraging sites	Effects on overwintering bird fitness	Establishing buffer zones	Establishing buffer zones
102	2006	Productivity of Black Oystercatchers: effects of recreational disturbance in a national park	Morse et al., 2006	The Condor	Aialik Bay and Kenai Fjords National Park	Alaska	Terrestrial	North America	North Pacific Ocean	Dfc	Ecological	Observational	People	Camping and Campsites	Breeding	Negative	Reduced reproductive performance	Lower productivity	Move campsites away from the traditional nest sites to minimize future disturbances	Moving campsites away from the traditional nesting sites
103	2006	Behaviour and breeding success of gentoo penguins Pygoscelis papua in areas of low and high human activity	Holmes et al., 2006	Polar Biology	subantarctic Macquarie Island	Australia	Terrestrial	Australia	South Pacific Ocean (Coral sea)	Csb	Ecological	Experimental	Pedestrian visitation	Walking	Breeding, vigilance, resting	Negative	Increased vigilance and decreased rest, displacement behaviours	None reported	Concentrating visitation may be a valid management option rather than exposing a greater number of sites to the effects of human activity. Using habituation as a management option	Concentrating visitation to a certain area without exposing whole habitat to tourism
104	2006	The Northern Fulmar (Fulmarus glacialis) in Arctic Canada: ecology, threats, and what it tells us about marine environmental conditions	Mallory, 2006	Environmental Reviews	Not specified	Canada	Terrestrial	North America	North Pacific Ocean	Dfb	Review article	Traditional Review	Walking people, vehicles	Walking, Powered Commercial Vehicles	Nest survival, breeding	Negative	Damaged or abandoned clutches, reduced nest attentiveness	Exposing the eggs or young to predators, or causing the eggs to roll out of the nest	Not specified	No Transferable Outcome
105	2006	The impact of tourism and personal leisure transport on coastal environments: a review.	Davenport and Davenport, 2006	Estuarine, Coastal and Shelf Science	Worlwide	Global	Both	Global	Global	Global	Review article	Traditional Review	People, outboard-powered boats, Personal watercraft (jet ski, wave runners), Off-road vehicles, kite surfing	Walking, Powered Personal Watercrafts, Powered Commercial Vehicles, Beach activities	Foraging, breeding, neating, disturbance related behaviors	Negative	Delayed post-foraging landing, Disrupted breeding, disturbed foraging and nesting, flushing at greater distances	Reduced fledging weight and survival	Leisure-related activities associated with tourism,and the infrastructural and transport arrangements associatedwith them, should take place within a biologically sustainable framework that minimises environmental deterioration andloss of ecological function and services.	Designing biologically sustainable visitor/ recreation management framework that minimises environmental deterioration and loss of ecological function and services.
106	2006	Environmental factors and spatial scale influence shorebirds’ responses to human disturbance	Yasué, 2006	Biological Conservation	Not specified	Canada	Terrestrial	North America	North Pacific Ocean	Cfb	Ecological	Observational	People	Walking	Foraging	Negative	Disturbed foraging behaviour, Inadequate feeding rates during this time may force shorebirds to migrate without sufficient fat reserves, or delay migration	None reported	Managers must strive to minimise the impacts of human disturbance on fitness rather than on the severity of behavioural responses	Minimising recreational disturbances which cause energy consuming behavioural chages of birds (flushing, vigilance)
107	2005	The effects of human presence, flock size and prey density on shorebird foraging rates	Yasué, 2005	Journal of Ethology	PachenaBeach (48°47¢N,125°07¢W), British Columbia, Canada	Canada	Terrestrial	North America	North Pacific Ocean	Cfb	Ecological	Observational	People	Presence of human	Foraging	Negative	Disturbed foraging	None reported	Not specified	No Transferable Outcome
108	2005	Effects of human disturbances on the behavior of wintering ducks	Pease et al., 2005	Wildlife Society Bulletin	Not specified	Chile	Both	South America	Southeastern Pacific Ocean	Csb	Ecological	Both Observational & Experimental	People, vehicles	Walking, Powered Commercial Vehicles, Non-Powered Personal vehicles	Disturbance related response	Negative	Disturbed resting and feeding, flushing from foraging grounds	Increased energy demands	Continued seasonal closure of the impoundment system in order to protect overwintering dabbling ducks from disturbance at a time when fat deposition and energy conservation are important, A tram or bus system is an access method that may reduce the impact on birds and other wildlife while allowing the public to see wildlife in natural areas.	Continued seasonal closure of the impoundment system. Introducing a shuttle service (trams or buses) to transport visitors inside the locations to reduce the impact from large number of personal vehicles.
109	2005	Using the risk-disturbance hypothesis to assess the relative effects of human disturbance and predation risk on foraging American Oystercatchers	Peters and Otis, 2005	The Condor	Cape Romain National Wildlife Refuge, South Carolina	USA	Aquatic	North America	North Atlantic Ocean	Cfa	Ecological	Observational	People	Walking	Foraging	Negative	Increased vigilance	None reported	Not specified	No Transferable Outcome
110	2005	Disturbance to brood-rearing Hooded Plover Thinornis rubricollis: responses and consequences	Weston and Elgar, 2005	Bird Conservation International	ocean beaches from Johanna Beach, west of Cape Otway to Oberon Bay, Wilson’s Promontory, Victoria, Australia	Australia	Terrestrial	Australia	Indian Ocean	Cfa	Ecological	Observational	People,dogs	Walking, Dog exercise	Chick survival	Negative	Discreased efficiency of foraging, disrupted brooding, separating chicks from their defending parents	Thermal sress to chicks due to disrupted brooding, energetic stress to chicks due do decreased foraging efficiency, reduced chick survival	Management of disturbance to broods, use of artificial chick shelters, shortening the duration of disruptions to foraging	Management of disturbance to broods, use of artificial chick shelters, shortening the duration of disruptions to foraging by limiting the visiting hours
111	2005	Physiological and behavioral differences in Magellanic penguin chicks in undisturbed and tourist‐visited locations of a colony	Walker et al., 2005	Conservation Biology	Colony at Punta Tombo, Argentina	Argentina	Terrestrial	South America	South Atlantic Ocean (Argentine sea)	BSk	Ecological	Observational	People	Walking	Physiological changes	Habituation	No significant negative impact	None reported	No significant negative impact to design management actions	No Transferable Outcome
112	2005	Individual variability of behavioural responses by Wandering Albatrosses (Diomedea exulans) to human disturbance	de Villers et al., 2005	Polar Biology	Sub-Antarctic Marion Island	South Africa	Terrestrial	Southern Africa	South Atlantic Ocean	ET	Ecological	Observational	People on foot	Walking	intensity of vocal reaction (IVR), intensity of non-vocal reaction (INR) and overall response index (ORI)	Negative	Reduced breeding	None reported	Minimum viewing distances	Establishing hideout or viewing platforms for visitors by considering FIDs of birds occupied the habitat
113	2005	Modeling the effects of limiting the number of visitors on failure rates of seabird nests	Beale and Monaghan, 2005	Conservation Biology	St. Abbs Head	Scotland	Terrestrial	Europe	North Atlantic Ocean (North sea)	Cfb	Ecological	Observational	People	Presence of people	Nesting	Negative	Nesting failures, abandoning breeding attempts	None reported	Limiting daily numbers of visitors	Issuing limited number of tickets/ allow limited number of visitors to enter the sites
114	2004	Human disturbance: people as predation‐free predators?.	Beale and Monaghan, 2004	Journal of Applied Ecology	seabird colony of St Abbs Head NNR, south-east Scotland	Scotland	Terrestrial	Europe	North Atlantic Ocean (North sea)	Cfb	Ecological	Observational	People	Presence of people	Breeding, nesting	Negative	Reduced breeding and nesting success	None reported	Managing access to wildlife areas, Visitors are kept further away from the nesting areas of vulnerable specie, Determining set-back distances for the largest party likely to visit the site	Managing access to wildlife areas, Visitors are kept further away from the nesting areas of vulnerable specie, Determining set-back distances for the largest party likely to visit the site
115	2004	Nature-based tourism impacts on yellow-eyed penguins Megadyptes antipodes: does unregulated visitor access aﬀect ﬂedging weight and juvenile survival?	McClung et al., 2004	Biological Conservation	Otago Peninsula, South Island, New Zealand	New Zealand	Terrestrial	Oceania	North Pacific Ocean	Cfb	Ecological	Observational	People	Presence of people	Chick growth	Negative	Lower fledging weights	Predation, Reduced juvenile survival	Minimal and well-regulated tourist visits	Regulating tourist visits to sensitive habitats for birds
116	2004	Factors affecting the escape behaviour of juvenile chinstrap penguins, Pygoscelis antarctica, in response to human disturbance	Martín et al., 2004	Polar Biology	Vapour Col chinstrappenguin colony on Deception Island, South Shetlands	Antarctica	Terrestrial	Antarctica	Southern Ocean	EF	Ecological	Observational	People	Walking	Escape	Neutral	Increased escape behaviour	None reported	Delimitation of buffer areas and advice on how tourists should behave when approaching penguins	Awareness programmes for visitors on how should they behave in bird colonies without disturbing the genral burd behaviour
117	2004	Small boats disturb fish-holding Marbled Murrelets	Speckman et al., 2004	Northwestern Naturalist	Auke Bay	Alaska	Aquatic	North America	North Pacific Ocean	Dfb	Ecological	Experimental	Boats	Powered Commercial Watercrafts, Non-Powered Commercial Watercrafts	Foraging	Negative	Decrease in food delivery to chicks	None reported	Not specified	No Transferable Outcome
118	2004	The effect of human activities on migrant shorebirds: successul adaptive management	Burger et al., 2004	Environmental Conservation	Reed beach, Delaware bay	USA	Terrestrial	North America	North Atlantic Ocean	Cfa	Ecological	Observational	Birders, walkers, sunbathers	Walking, Beach activities	Foraging	Negative	Disrupted foraging	None reported	Restricted access, built viewing platforms for ecotourists, eventually patrolled key beaches	Restricted visitor access, viewing platforms for ecotourists, eventually patrolled key beaches
119	2004	Effects of temporal and spatial hunting control in waterbird reserves	Bregnballe et al., 2004	Biological Conservation	two Danish coastal wetland areas	Denmark	Terrestrial	Europe	North Atlantic Ocean	Cfb	Ecological	Experimental	Hunting	Hunting Birds for Recreation	Habitat use, abundance	Negative	Abandoning staging areas	Disturbed foraging and roosting	Establishment of shooting-free refuge areas, restricting shooting to a limited period of the day, a buffer zone of 500 m to ensure safety against shooting disturbance	Establishment of shooting-free refuge areas and buffer zones, restricting shooting to a limited period of the day
120	2004	Ecological studies toward the management of an Antarctic tourist landing site (Penguin Island, South Shetland Islands)	Pfeiffer and Peter, 2004	Polar Record	Penguin Island (southeast of King George Island, South Shetland Islands	Antarctica	Terrestrial	Antarctica	Antarctic Ocean/ the Austral Ocean	EF	Ecological	Observational	Walking people	Walking	Physiology (heart-rate), abundance	Negative	Birds are flushed away	Increased alertness and defensive behaviour of nearby incubating birds.	Serving some areas as refuge areas, Use of a specific path to localise impacts in a prescribed area	Establishment of refuge areas and designing specific paths for tourists
121	2003	Human disturbance and nesting success of Common Eiders: interaction between visitors and gulls	Bolduc and Guillemette, 2003	Biological Conservation	Mingan ArchipelagoNational Park Reserve, Que´bec, Canada	Canada	Terrestrial	North America	North Atlantic Ocean	Dfb	Ecological	Observational	People	Presence of people	Abundance	Negative	Nest failures	Reduced nesting success	Visit eider colonies as late as possible, and avoid visiting colonies associated with high densities of eider egg predators.	Restricted human visitation in areas with high risk of predation to reduce the nest abandonment by adults
122	2003	The effects of vehicle passage on foraging behavior of wading birds	Stolen, 2003	Waterbirds	Merritt Island National Wildlife Refuge (MINWR), Florida	USA	Terrestrial	North America	North Atlantic Ocean	Cfa	Ecological	Both Observational & Experimental	Vehicle	Powered Commercial Vehicles,	Foraging	Negative	Resuced foraging behaviour, flushing	None reported	Concentrating ecotourism in certain areas, educating ecotourists about the effect of their behaviour on wading birds	Concentrating ecotourism in certain areas without exposing whole habitat to visitors. Awareness programmes, education programmes about the recreational disturbances and their consequences on birds
123	2003	Evidence that human disturbance reduces Snowy Plover chick survival	Ruhlen et al., 2003	Journal of Field Ornithology	Point Reyes and Limantour beaches in Point Reyes National Sea shore, Marin County, California	USA	Terrestrial	North America	North Pacific Ocean	Cfa	Ecological	Both Observational & Experimental	People	Presence of people	Chick survival	Negative	Chick loss, shifting behavior from foraging and brooding to crouching or vigilance, separation of one or more chicks from the rest of the brood	Reduced chick survival	Information is needed on how human recreation contributes to chick mortality in plovers so that appropriate management actions can be developed to reduce human-induced chick loss	Gathering information and identifying the relationship between human recreational disturbance and chick mortality. Designing appropriate management solutions by considering those information
124	2003	Do fences protect birds from human disturbance?	Ikuta and Blumstein, 2003	Biological Conservation		USA	Terrestrial	North America	North Pacific Ocean	Cfa	Ecological	Experimental	People	Presence of people	FID	Negative	Increased FID	None reported	Restrict public access with a fence or some similar barrier	Using physical barriers such fences to restrict human access
125	2003	Personal watercraft and boats: Coastal conflicts with common terns	Burger, 2003	Lake and Reservoir Management	Barnegat Bay, New Jersey	USA	Both	North America	North Atlantic Ocean	Cfa	Ecological	Observational	Powered watercrafts and boats	Powered Personal Watercraft, Powered Commercial Watercrafts	Nesting	Negative	Birds have to move to unfavourable habitats, reduced reproductive success	None reported	Education and public meetings about the impacts of disturbance, increased signage, enforcement, designated zones for PWCs	Education and public meetings about the impacts of disturbance, increased signage, enforcement, designated zones for PWCs
126	2003	An experimental investigation of the effects of human intrusion into breeding colonies of Bridled Terns Sterna anaethetus in the Great Barrier Reef	Gyuris, 2003	Pacific Conservation Biology	Great Barrier Reef	Australia	Terrestrial	Australia	South Pacific Ocean (Coral sea)	Aw	Ecological	Observational	People	Presence of people	Hattching success	Neutral (Habituation)	No significant negative impact	None reported	No significant negative impact to design management actions	No Transferable Outcome
127	2002	Buffer‐zone distances to protect foraging and loafing waterbirds from disturbance by personal watercraft and outboard‐powered boats	Rodgers and Schwikert, 2002	Conservation Biology	east and west coasts of Florida	USA	Aquatic	North America	North Atlantic Ocean	Cfa	Ecological	Experimental	Powered boats and PWC	Powered Personal Watercraft, Powered Commercial Watercrafts	Foraging, loafing	Negative	Larger flush distances	None reported	Establishing buffer zones, well-designed educational and enforcement program of conservation laws	Establishing buffer zones, well-designed educational and enforcement program of conservation laws
128	2002	Effects of motorboats and personal watercraft on nesting terns: conflict resolution and the need for vigilance	Burger, 2002	Journal of Coastal Research	Mike's Island in Barnegat Bay, New Jersey	USA	Aquatic	North America	North Atlantic Ocean	Cfa	Ecological	Observational	PWC, motor boats	Powered Personal Watercraft, Powered Commercial Watercrafts	Breeding	Negative	Birds are flushed away, reduced reproductie success	Eventually abandoning nesting habitat	Public meetings and an educational campaign aimed at local PWC rental businesses	Public meetings and an educational campaign aimed at local PWC rental businesses
129	2002	Impacts of man-made landscape features on numbers of estuarine waterbirds at low tide	Burton et al., 2002	Environmental Management	six estuaries in southern England	England	Aquatic	Europe	North Atlantic Ocean	Cfb	Ecological	Observational	Walkers, dogs	Recreation Infrastructure - Terrestrial, walking, dog exercise	Abundance	Negative	Decrease in abundance	None reported	New routes should avoid areas that hold high waterbird densities. Roads may only have to be placed 25 m from the high tide mark to avoid disturbing birds feeding at low tide	Density of birds and their behaviours should be taken to account when designing roads, footpaths or nature trails
130	2002	Seabirds of the Southern Lagoon of New Caledonia; distribution, abundance and threats	Benoit and Bretagnolle, 2002	Waterbirds	southern Lagoon of New Caledonia, southwest Pacific	Australia	Terrestrial	Australia	South Pacific Ocean (Coral sea)	Csb	Ecological	Observational	People, boats	Presence of people, Powered Commercial Watercrafts	Breeding, abundance	Negative	Reduced breeding success, habitat abandonment	None reported	Not specified	No Transferable Outcome
131	2002	Sources and extent of human disturbance to waterbirds in the UK: an analysis of Wetland Bird Survey data, 1995/96 to 1998/99	Robinson & Pollitt, 2002	Bird Study	WeBS sites	UK	Both	Europe	North Atlantic Ocean	Cfb	Ecological	Observational	Walkers, dogs, horse-riders, anglers, shooters, bait-diggers, shellfishers, unpowered boats, powered boats, vehicles, windsurfers, jet-skis, micro-lights and other aircraft	Walking, Dog exercise, Powered Commercial Watercrafts, Non-Powered Commercial Watercraft, Powered Personal Watercraft, Non-Powered Personal Watercraft, Powered Commercial Aircraft, Powered Commercial Vehicles, Beach fishing,	Disturbance related behaviur	Negative	Birds are flushed away	None reported	Not specified	No Transferable Outcome
132	2001	Birds at a Southern California beach: seasonality, habitat use and disturbance by human activity	Lafferty, 2001a	Biodiversity and Conservation	Santa Barbara beach	USA	Terrestrial	North America	North Pacific Ocean	Csb	Ecological	Observational	People, dogs	Walking, jogging, Dog exercise	Habitat use	Neutral	Birds move or fly away	None reported	Concentrating human activity away from prefered shorebird habitat (such as lagoon and rocky intertidal areas), strategic distribution of parking lots and beachaccess points, reducing the frequency of high impact activity (unleashed pets) regulating the time, place and manner of public access	Concentrating human activity away from prefered shorebird habitat (such as lagoon and rocky intertidal areas), strategic distribution of parking lots and beachaccess points, reducing the frequency of high impact activity (unleashed pets) regulating the time, place and manner of public access
133	2001	Disturbance to wintering western snowy plovers	Lafferty, 2001b	Biological Conservation	public beach near Devereux Slough in Santa Barbara, California	USA	Terrestrial	North America	North Pacific Ocean	Csb	Ecological	Observational	People, dogs	Presence of people, Dog exercise	Escape	Negative	Decline in feeding rates, habitat abandonment	None reported	Prohibiting dogs, buffer zone surrounding a stretch of beach	Establishment of buffer zones around important bird areas. Restrictions on dog exercise
134	2001	The effects of disturbance on habitat use by black-tailed godwits Limosa limosa	Gill et al., 2001	Journal of Applied Ecology	east coast of England (the Alde, Deben, Orwell, Colne and Blackwater)	UK	Both	Europe	North Atlantic Ocean	Cfb	Ecological	Observational	People, dogs, aircrats, bicycles, watercrats	Walking, Dog exercise, Powered Commercial Watercrafts, Non-Powered Commercial Watercraft, Powered Commercial Aircraft, Non Powered Personal Vehicles	Habitat use	Neutral	Birds are avoiding specific areas	None reported	Understanding the population consequences	Understanding the population consequences to apply appropriate conservation strategies
135	2001	Tourism and recreation at seabird breeding sites in Patagonia, Argentina: Current concerns and future prospects	Yorio et al., 2001	Bird Conservation International	coastal Patagonia, Argentina	Argentina	Terrestrial	South America	South Atlantic Ocean (Argentine sea)	BSk	Ecological	Observational	People	Presence of people	Breeding	Negative	Destruction of nests or their contents, desertion of offspring	Negative effects on seabird reproduction	Establishment of sanctuaries, the limitation of visitor numbers, temporal and spatial zoning	Establishment of sanctuaries and zoning of beaches on temporal and spatial scale. Limitations on visitor numbers allowed in particular location
136	2001	Successful conservation measures and new breeding records for Damara Terns Sterna balaenarum in Namibia	Braby et al., 2001	Marine Ornithology	Caution Reef	Nambia	Terrestrial	Southern Africa	South Atlantic Ocean	BSh	Ecological	Observational	Tourist traffic, ORV	Presence of people, Powered Commercial Vehicles	Hattching success of eggs	Negative	Decrease in hatching success, resuced nesting density	None reported	Barriers to prevent off-road driving across bird colonies	Barriers to prevent off-road driving across bird colonies
137	2001	Effects of human activity on the structure of coastal marine bird assemblages in central Chile	Cornelius et al., 2001	Conservation Biology	rocky shore at Las Cruces (lat. 33?30'S, long. 71?38'W) on the central coast of Chile	Chile	Terrestrial	South America	Southeastern Pacific Ocean	Csb	Ecological	Observational	People (collection of marine intertidal organisms by humans)	Presence of people	Abundance	Negative	Reduced abundance of birds, changing both the spatial and temporal distribution of birds along the shore	None reported	Reserves to allow for a more natural pattern of bird dynamics	Establishing reserves or refuge areas with no visitor pressure
138	2001	Effects of human approaches to nests of northern New Zealand dotterels	Lord et al., 2001	Biological Conservation	nine dierent beaches on the east coast of the North Island of New Zealand.	New Zealand	Terrestrial	Oceania	South Pacific Ocean	Cfb	Ecological	Experimental	People, dogs	Walking, Dog exercise	Nesting	Negative	Disruption to incubation, more time spent off the nest	None reported	Human activity, particularly the walking of dogs, should be limited near nesting sites	Limitations on human activities which disturb the birds in higher magnitude nad dog exercise
139	2000	A study of the impact of human disturbance on Wigeon Anas penelope and Brent Geese Branta bernicla hrota on an Irish sea loch	Mathers et al., 2000	Wildfowl	Strangford Loch, Northern Ireland	Ireland	Terrestrial	Europe	North Atlantic Ocean	Cfb	Ecological	Observational	People	Walking	Abundance	Negative	Population decline of less tolerant species, reduced foraging	None reported	Designing buffer zones, removing highly mobile activities from areas important for birds	Designing buffer zones and visitor-free zones
140	2000	Shorebird distributions on ocean beaches of northern California	Colwell and Sundeen, 2000	Journal of Field Ornithology	Ocean Beaches Of Northern California	USA	Terrestrial	North America	North Pacific Ocean	Csb	Ecological	Observational	Walkers, joggers, vehicle and unleashed dogs	Presence of people, Dog exercise	Number of species and abundance	Neutral	No significant negative impact	None reported	Continued research to identify relationships between bird and human uses of beaches	Continued research to identify relationships between bird and human uses of beaches
141	2000	Individual distances among Greater Flamingos as indicators of tourism pressure	Yosef, 2000	The International Journal of Waterbird Biology	salt pans 10 km north of Eilat, Israel	Israel	Aquatic	West Asia	Indian Ocean	BWh	Ecological	Observational	People, vehicle	Walking, Powered Commercial Vehicles	Vigilance	Negative	Increased vigilance, flushing away	None reported	Limiting access, building hides by planting local plant species	Limiting access, building hides by planting local plant species
142	2000	Human disturbance and the chick-rearing ability of African black oystercatchers (Haematopus moquini): a geographical perspective	Leseberg et al., 2000	Biological Conservation	Marcus Island in the West Coast National Park (33 020S, 17 580E), De Mond sanctuary within the Cape of Good Hope Nature Reserve(N.R.) (34 150S, 18 230E), South coast (Indian Ocean) sites at De Hoop N.R. (34 290S, 20 300E) andGoukamma N.R. (34 040S, 22 500E)	South Africa	Terrestrial	Southern Africa	South Atlantic Ocean	BSk	Ecological	Observational	People	Presence of people	Disturbance related behavior, foraging, chick growth/survival	Negative	Reduced foraging, distruction of nests, increased energy demands	Adults having insufficient time to satisfy both their own energy demands and those of their young.	Not specified	No Transferable Outcome
